# Supplementary material for: Synthesis and absorption performance of core–shell magnetic polymers for solid phase extraction and detection of glibenclamide in hypoglycemic health products
Source: Royal Society of Chemistry journal article supplement (doi:10.1039/c7nj02631e), 2017-01-01
Supplement: c7nj02631e1.pdf [file c7nj02631e1.pdf]

Electronic Supplementary Material (ESI) for New Journal of Chemistry.  
This journal is © The Royal Society of Chemistry and the Centre National de la Recherche Scientifique 2017

**Synthesis and absorption performance of core-shell magnetic  
polymers for solid phase extraction and detection of glibenclamide in  
hypoglycemic health products**

Zong-yuan WU, Xiao-yan LI \*, Min LIU, Fang WANG, Li LIU, Xue-cai TAN, Fu-hou LEI

**Table of contents:**

- 1) Fig S1-S2
- 2) Table S1-S2

Fig S1 The standard curve of glibenclamide

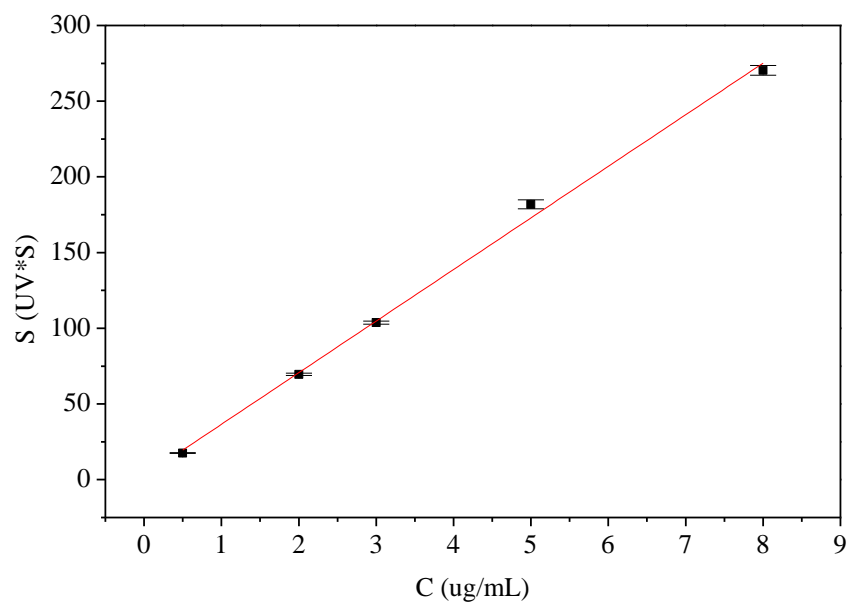

Fig S2 Adsorption-elution times of glibenclamide bound to MGTP II

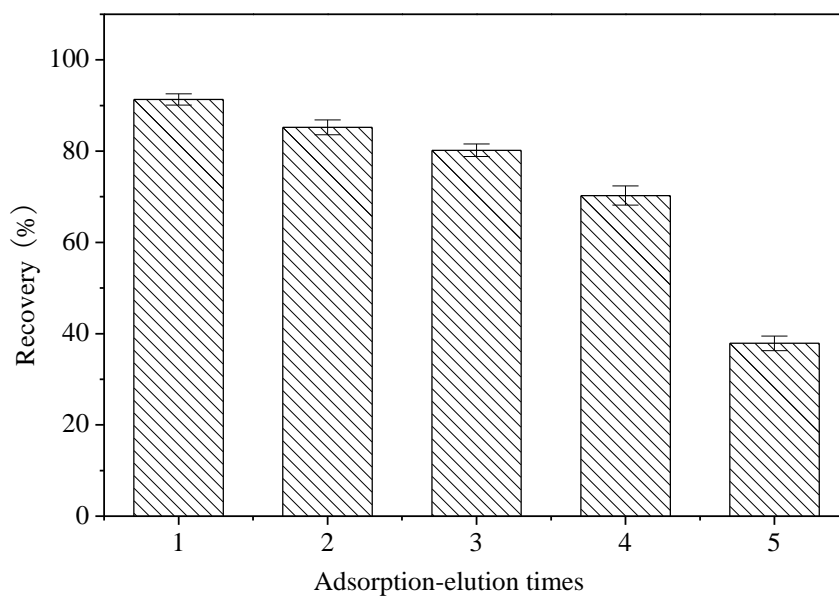

Table S1 Comparison with other materials

| NO. | Materials    | Reaction type          | Reaction time(h) | Adsorption capacities(mg/g) | Adsorption equilibrium time(h) | Reference                                                                               |
|-----|--------------|------------------------|------------------|-----------------------------|--------------------------------|-----------------------------------------------------------------------------------------|
| 1   | Gb-sMIPs(G0) | surface polymerization | 36               | 42.15                       | 1/3                            |                                                                                         |
| 2   | Gb-sNIPs(G0) | surface polymerization | 36               | 24.64                       | 1/3                            | Wang RY, Wang Y, Xue C, Wen TT, Wu JH, Hong JL, Zhou XM, J Sep Sci 36:1015-1021 (2013). |
| 3   | Gb-sMIPs(G1) | surface polymerization | 36               | 49.52                       | 1/3                            |                                                                                         |
| 4   | Gb-sNIPs(G1) | surface polymerization | 36               | 25.31                       | 1/3                            |                                                                                         |
| 5   | MIP          | surface polymerization | 24               | ≈45                         | 24                             | Lahsini R, Louhaichi MR, Adhoum N and Monser L, Acta Pharmaceut 63:265-275 (2013).      |
| 6   | NIP          | surface polymerization | 24               | ≈12                         | 24                             |                                                                                         |
| 7   | MGTP II      | surface polymerization | 12               | 33.27                       | 1/2                            | Manuscript method                                                                       |

Table S2 LOD of different methods

| Method            | Linear range( $\mu\text{g/mL}$ ) | LOD( $\mu\text{g/mL}$ ) | RSD(%)      | Reference                                                                                                                    |
|-------------------|----------------------------------|-------------------------|-------------|------------------------------------------------------------------------------------------------------------------------------|
| HPLC-SPE          | 0.2-20.0                         | 0.1                     | $\leq 6.5$  | ZHOU CY, TANG BB, XI CX, CHENG DD, ZHANG L, PENG T, WANG GM, CHEN ZQ, J Instrumental Anal(Chinese), 2013, 32(10): 1212-1216. |
| RP-IPC-DAD        | 2.02-80.8                        | 0.51                    | $\leq 2.8$  | CUI M, LI N, QIN F, LI FM, XIONG ZL, Chromatographia, 2010, 72(11-12):1189-1194                                              |
| HPLC-MS/MS        | -                                | 0.1-0.3                 | $\leq 9.8$  | ZHU DM, CHEN DD, MA W, PENG T, LI XJ, LI L, DAI HH, TANG Z, Chinese J Anal Chem, 2011, 39(2):213-218                         |
| RP-IPLC           | 100-300                          | 0.08                    | $< 0.6$     | Rao BU, Nikalje AP, J Anal Bioanal Tech, 2010, 1:1-5.                                                                        |
| HPLC-MIP-SPE      | -                                | 0.04                    | -           | Lahsini R, Louhaichi MR, Adhoum N and Monser L, Acta Pharmaceut 63:265-275 (2013).                                           |
| Manuscript method | 0.5-8                            | 0.05                    | $\leq 1.97$ | -                                                                                                                            |
